# Supplementary material
Source: Research Square preprint supplement (doi:10.21203/rs.3.rs-9192715/v1)
Supplement: Supplementary file 1 [file d58e1fd878905f1e7c1caad4.docx]

**Supplementary Information**

**Supplementary Section S1: Simulation Parameters**

Table S1 lists all simulation parameters used in this study, following IEEE 802.11ax PHY specifications (IEEE Std 802.11ax-2021, Table 27-1).

| **Parameter** | **Value** | **Reference** |
| --- | --- | --- |
| Bandwidth | 20 MHz (primary) | IEEE 802.11ax Table 27-1 |
| FFT size (N) | 64 subcarriers | IEEE 802.11ax §27.3.2 |
| Data subcarriers (N_data) | 52 (positions 6–31, 33–58) | IEEE 802.11ax §27.3.2.3 |
| Guard interval | 0.8 μs (16 samples @ 20 MHz) | IEEE 802.11ax Table 27-16 |
| Symbol duration | 12.8 μs + 0.8 μs GI = 13.6 μs | IEEE 802.11ax |
| K-R training pilots | 52 HE-LTF data subcarriers | This work — standard reuse |
| Modulation (baseline) | 64-QAM | IEEE 802.11ax §27.5 |
| LDPC code rate | 1/2 | IEEE 802.11ax §27.3.11 |
| ADC resolution | 5-bit (baseline); 3–8 bit sweep | Uniform midrise quantiser |
| Rapp PA smoothness | p = 2 | Standard model (Rapp 1991) |
| PA saturation amplitude | A_sat = 0.7 (baseline) | Realistic WiFi AP value |
| Clipping ratio | CR = 10 (baseline, no clip) | CR < 5 activates clipping |
| IQ amplitude error | ε = 3% | Schenk (2008) |
| IQ phase error | φ = 3° | Schenk (2008) |
| Ridge regularisation λ | 10⁻³ | Standard ridge LS |
| Monte Carlo trials | 2,000–3,000 | Per condition |
| Random seed | 2025 | Full reproducibility |
| Channel model | IEEE TGax Model D (primary) | IEEE 802.11ax Annex E |
| Carrier frequency | 5.2 GHz | WiFi 5 GHz band |
| Max Doppler (30 m/s) | 553 Hz | v·f_c/c = 0.3×5.2e9/3e8 |

**Supplementary Section S2: Proof of Theorem 1 (MSE Decomposition)**

**Theorem 1.** *For the K-R receiver with feature space ℝ¹² and ridge regularisation λ, the expected MSE satisfies:*

*E[|x̂ − x|²] ≤ MSE_MMSE − γ_Q − γ_CE*

*where γ_Q ≥ 0 is the quantisation floor reduction and γ_CE ≥ 0 satisfies the lower bound γ_CE ≥ (K_feat/N_p) · ρ/(1+ρ) · E[|e_K|²].*

**Proof.** Decompose the total MSE into three components. Let r_q = K(y) be the K-step output, e_K = x − r_q the K-step residual, and x̂ = r_q + F·W₂* the K-R output.

Step 1 (K step bound): By the MMSE optimality of the K step, E[|r_q − x|²] ≤ MSE_ideal + γ_Q where γ_Q = MSE_ideal − MSE_MMSE ≥ 0 captures the MSE reduction from correcting the quantisation-induced bias. The quantisation floor γ_Q arises because the ADC introduces a structured systematic error (not white noise), which the MMSE estimator partially resolves.

Step 2 (R step bound): The ridge LS solution W₂* = (FᵀF + λI)⁻¹FᵀT minimises the regularised least-squares objective. By the optimality of ridge regression, E[|F·W₂* − e_K|²] ≤ E[|e_K|²] · (1 − ρ/(1+ρ) · K_feat/N_p). Therefore, the R step reduces the residual MSE by at least:

*γ_CE ≥ (K_feat / N_p) · ρ/(1+ρ) · E[|e_K|²]*

Step 3 (Dominance at low SNR): As ρ → 0, the K-step residual e_K grows (channel estimation errors dominate). Simultaneously, the ADC contribution γ_Q → 0 (low SNR → quantisation noise subdominant). Therefore, at the coverage edge, γ_CE/γ_Q → ∞, confirming γ_CE dominates. This is validated empirically in Fig. 3a and Table S2. □

**Table S2**

*Empirical γ_CE vs γ_Q decomposition (Rapp A=0.7, ADC 5-bit, n=800 per SNR).*

| **SNR (dB)** | **γ_Q** | **γ_CE** | **γ_CE/γ_Q** | **Dominant** |
| --- | --- | --- | --- | --- |
| 0 | ≈0 | 0.072 | **>>1** | **γ_CE** |
| 5 | ≈0 | 0.061 | **>>1** | **γ_CE** |
| 10 | ≈0 | 0.071 | **>>1** | **γ_CE** |
| 15 | ≈0 | 0.093 | **>>1** | **γ_CE** |
| 20 | ≈0 | 0.112 | **>>1** | **γ_CE** |
| 25 | ≈0 | 0.122 | **>>1** | **γ_CE** |
| 30 | ≈0 | 0.127 | **>>1** | **γ_CE** |

**Supplementary Section S3: Extended Results — All 12 Scenarios**

| **#** | **Scenario** | **K-R SE** | **MMSE SE** | **Gain** | **p-value** | **n** |
| --- | --- | --- | --- | --- | --- | --- |
| S1 | Standard PHY, TGax-D, @20dB | 4.703 | 4.277 | **+0.426** | <10⁻³⁰⁰ | 2,000 |
| S2 | TGax-D, Doppler 30 m/s | 4.704 | 4.278 | **+0.426** | <10⁻³⁰⁰ | 2,000 |
| S2 | TGax-B, residential, static | 4.703 | 4.277 | **+0.426** | <10⁻³⁰⁰ | 2,000 |
| S3 | Rapp A=0.7, std PA | 4.721 | 4.287 | **+0.434** | <0.001 | 2,000 |
| S3 | Rapp A=0.5, severe PA | 4.429 | 4.046 | **+0.383** | <0.001 | 2,000 |
| S3 | ADC 4-bit | 4.609 | 4.228 | **+0.381** | <0.001 | 2,000 |
| S3 | Clip CR=1.0 | 4.577 | 4.243 | **+0.334** | <0.001 | 2,000 |
| S3 | ALL impairments joint | 4.493 | 4.101 | **+0.392** | <0.001 | 2,000 |
| S4 | 4×4 MIMO, Kronecker | 4.699 | 4.277 | **+0.422** | <0.001 | 1,000 |
| S5 | LS channel estimation | 5.387 | 5.338 | **+0.049** | 0.0007 | 2,000 |
| S6 | LDPC BLER reduction | <MMSE |  | — | <0.05 | 800 |
| S7 | PA mismatch (A=0.3) | 4.094 | 3.738 | **+0.355** | <0.001 | 2,000 |
| S8 | Feature ablation (12f) | 4.703 | 4.277 | **+0.426** | <0.001 | 2,000 |
| S9 | Complexity (KR 112μs) | — | — | — | — | 500 |
| S10 | 3,000 MC validation | 4.699 | 4.276 | **+0.423** | <10⁻²³⁸ | 3,000 |
| S11 | Outdoor 30m/s+IQ | 4.841 | 4.438 | **+0.403** | <0.001 | 2,000 |
| S11 | High mob.+severe PA | 4.369 | 4.007 | **+0.362** | <0.001 | 2,000 |
| S12 | Energy: +84.7 bps/Hz/W | — | — | — | — | — |

**Supplementary Section S4: Feature Physical Meaning and Ablation**

Table S3 maps each of the 12 K-R features to its physical distortion source, the simulation scenario that validates its contribution, and the expected behaviour when the feature is removed.

| **#** | **Feature** | **Expression** | **Physical source** | **Validates in** | **Novel** |
| --- | --- | --- | --- | --- | --- |
| 1 | Re | Re(r_q) | Linear I component | All scenarios |  |
| 2 | Im | Im(r_q) | Linear Q component | All scenarios |  |
| 3 | mag | |r_q| | Amplitude — PA saturation proxy | S3 Rapp sweep |  |
| 4 | phase | ∠r_q | Phase — IQ imbalance proxy | S3 IQ scenario |  |
| 5 | ch-pwr | |ĥ|² | Channel power — freq. selectivity | S1, S2, S4 |  |
| 6 | noise | σ_n | Noise std — from pilot estimate | S10 statistics |  |
| 7 | Re² | Re²(r_q) | Quadratic I — ADC clipping | S3 ADC bits |  |
| 8 | Im² | Im²(r_q) | Quadratic Q — ADC clipping | S3 ADC bits |  |
| 9 | Re·Im | Re·Im | IQ cross-term — phase error | S3 IQ |  |
| 10 | **|r|³** | |r_q|³ | RAPP 3rd-order distortion (KEY) | S7 generalisation | **★** |
| 11 | **PAPR** | PAPR_pkt | PA drive level per packet | S3 clipping | **★** |
| 12 | **clip_f** | c_f∈{0,1} | Clipping flag — activates selectively | S3 CR sweep | **★** |

**Supplementary Section S5: Code Availability**

All simulation code is provided as supplementary Python files (kr_wifi_standard.py). The code requires Python ≥ 3.10, NumPy ≥ 1.24, and SciPy ≥ 1.10. All results are reproducible by running the main simulation file with seed = 2025. The complete JSON results database (WiFi_KR_Standard_Results.json) is also provided as supplementary data.

Runtime: approximately 45 minutes on a standard CPU (Intel Core i7, 8-core, 3.2 GHz). No GPU required.
